# Supplementary material for: Levels and Change in Galectin‐3 and Association With Cardiovascular Events: The ARIC Study
Source: PubMed Central journal article supplement (PMC7670497; doi:10.1161/jaha.119.015405), 2020-06-23
Supplement: JAH3-9-e015405-s001.pdf [file JAH3-9-e015405-s001.pdf]

# **SUPPLEMENTAL MATERIAL**

**Table S1. Spearman’s correlation coefficients for ARIC visit 4 galectin-3 and cardiovascular disease risk factors.**

|                                   | <b>Spearman’s <i>r</i></b> | <b>P value</b> |
|-----------------------------------|----------------------------|----------------|
| Age (years)                       | 0.17                       | <0.0001        |
| hs-CRP (mg/L)                     | 0.24                       | <0.0001        |
| NT-proBNP (pg/mL)                 | 0.16                       | <0.0001        |
| hs-TnT (ng/L)                     | 0.05                       | <0.0001        |
| hs-TnI (ng/L)                     | 0.05                       | <0.0001        |
| Total cholesterol (mg/dL)         | 0.07                       | <0.0001        |
| Triglycerides (mg/dL)             | 0.09                       | <0.0001        |
| HDL-C (mg/dL)                     | 0.05                       | <0.0001        |
| LDL-C (mg/dL)                     | 0.01                       | 0.27           |
| eGFR (mL/min/1.73m <sup>2</sup> ) | -0.21                      | <0.0001        |
| Fasting glucose (mg/dL)           | -0.01                      | 0.19           |
| ALT (u/L)                         | -0.08                      | <0.0001        |
| Uric acid (mg/dL)                 | 0.10                       | <0.0001        |
| BMI (kg/ m <sup>2</sup> )         | 0.11                       | <0.0001        |
| Waist circumference (cm)          | 0.09                       | <0.0001        |
| SBP (mm Hg)                       | 0.08                       | <0.0001        |
| DBP (mm Hg)                       | -0.04                      | 0.0001         |
| Pulse pressure (mm Hg)            | 0.12                       | <0.0001        |
| Heart rate (beats per minute)     | 0.06                       | <0.0001        |

BMI, body mass index; DBP, diastolic blood pressure; eGFR, estimated glomerular filtration rate; HDL-C, high-density lipoprotein cholesterol; hs-CRP, high-sensitivity C-reactive protein; hs-TnI, high-sensitivity troponin I; hs-TnT, high-sensitivity troponin T; LDL-C, low-density lipoprotein cholesterol; LVH, left ventricular hypertrophy (Cornell ECG criteria); NT-proBNP, N-terminal pro-B-type natriuretic peptide; SBP, systolic blood pressure

**Table S2. Cardiovascular outcomes by galectin-3 quartiles at ARIC visit 4.**

|                           | <b>Quartiles of Galectin-3 (ng/mL)</b>        |                                              |                                                |                                               | <b>P trend</b> |
|---------------------------|-----------------------------------------------|----------------------------------------------|------------------------------------------------|-----------------------------------------------|----------------|
|                           | <b>1<sup>st</sup> quartile<br/>(4.4–11.9)</b> | <b>2<sup>nd</sup> quartile<br/>(12–14.1)</b> | <b>3<sup>rd</sup> quartile<br/>(14.2–16.7)</b> | <b>4<sup>th</sup> quartile<br/>(16.8–114)</b> |                |
| <b>CHD</b>                |                                               |                                              |                                                |                                               |                |
| Incidence rates           | 10.8 (9.8-11.9)                               | 10.2 (9.2-11.3)                              | 10.1 (9.1-11.2)                                | 13.8 (12.6-15.1)                              | 0.001          |
| Model 1                   | 1 (reference)                                 | 1.01 (0.88-1.17)                             | 1.05 (0.91-1.22)                               | 1.45 (1.26-1.68)                              | <0.0001        |
| Model 2                   | 1 (reference)                                 | 1.01 (0.87-1.16)                             | 1.04 (0.89-1.20)                               | 1.40 (1.20-1.62)                              | <0.0001        |
| Model 3                   | 1 (reference)                                 | 0.98 (0.84-1.13)                             | 0.99 (0.85-1.15)                               | 1.29 (1.11-1.50)                              | 0.0003         |
| <b>Ischemic stroke</b>    |                                               |                                              |                                                |                                               |                |
| Incidence rates           | 2.9 (2.4-3.5)                                 | 3.5 (3.0-4.1)                                | 3.5 (3.0-4.2)                                  | 5.4 (4.7-6.2)                                 | <0.0001        |
| Model 1                   | 1 (reference)                                 | 1.15 (0.89-1.48)                             | 1.10 (0.85-1.43)                               | 1.52 (1.18-1.95)                              | 0.004          |
| Model 2                   | 1 (reference)                                 | 1.13 (0.88-1.46)                             | 1.08 (0.83-1.40)                               | 1.44 (1.11-1.86)                              | 0.021          |
| Model 3                   | 1 (reference)                                 | 1.09 (0.84-1.42)                             | 1.06 (0.81-1.38)                               | 1.38 (1.06-1.80)                              | 0.054          |
| <b>HF hospitalization</b> |                                               |                                              |                                                |                                               |                |
| Incidence rates           | 7.9 (7.1-8.9)                                 | 9.2 (8.3-10.2)                               | 10.7 (9.7-11.8)                                | 16.7 (15.4-18.1)                              | <0.0001        |
| Model 1                   | 1 (reference)                                 | 1.11 (0.95-1.30)                             | 1.17 (1.01-1.37)                               | 1.56 (1.34-1.81)                              | <0.0001        |
| Model 2                   | 1 (reference)                                 | 1.10 (0.94-1.28)                             | 1.13 (0.97-1.32)                               | 1.45 (1.24-1.69)                              | <0.0001        |
| Model 3                   | 1 (reference)                                 | 1.03 (0.88-1.21)                             | 1.05 (0.90-1.23)                               | 1.27 (1.09-1.49)                              | 0.004          |
| <b>Total mortality</b>    |                                               |                                              |                                                |                                               |                |
| Incidence rates           | 17.7 (16.4-19.1)                              | 20.0 (18.7-21.5)                             | 20.0 (18.7-21.5)                               | 29.0 (27.3-30.9)                              | <0.0001        |
| Model 1                   | 1 (reference)                                 | 1.10 (0.99-1.22)                             | 1.09 (0.98-1.21)                               | 1.49 (1.35-1.65)                              | <0.0001        |
| Model 2                   | 1 (reference)                                 | 1.09 (0.99-1.21)                             | 1.07 (0.97-1.19)                               | 1.45 (1.31-1.61)                              | <0.0001        |
| Model 3                   | 1 (reference)                                 | 1.05 (0.94-1.16)                             | 1.02 (0.92-1.13)                               | 1.34 (1.20-1.49)                              | <0.0001        |

Incidence rates are presented as rate/1,000 person years (95% confidence interval). Model data are presented as hazard ratio (95% confidence interval). For coronary heart disease (CHD), ischemic stroke, and total mortality, model 1 was adjusted by age, sex, race, total cholesterol,

HDL-C, SBP, antihypertensive medication, current smoking, and diabetes status (Pooled Cohort Equation variables); for heart failure (HF) hospitalization, model 1 was the ARIC heart failure model and included age, sex, race, SBP, antihypertensive medication, current smoking, diabetes status, BMI, and heart rate. Model 2 was model 1 plus eGFR. Model 3 was model 2 plus log NT-proBNP and log hs-TnT.

**Table S3. Baseline characteristics across ARIC visit 5 galectin-3 quartiles (group 2; N=4829).**

| Risk factors                            | Quartiles of Galectin-3 (ng/mL)                  |                                                   |                                                   |                                                  | P trend |
|-----------------------------------------|--------------------------------------------------|---------------------------------------------------|---------------------------------------------------|--------------------------------------------------|---------|
|                                         | 1 <sup>st</sup> quartile<br>(4.2-13.9)<br>n=1218 | 2 <sup>nd</sup> quartile<br>(14.0-16.7)<br>n=1211 | 3 <sup>rd</sup> quartile<br>(16.8-20.1)<br>n=1195 | 4 <sup>th</sup> quartile<br>(20.2-104)<br>n=1205 |         |
| Age (year)                              | 74.3 ± 4.9                                       | 74.6 ± 4.8                                        | 75.9 ± 5.2                                        | 76.5 ± 5.4                                       | <0.001  |
| Female (%)                              | 49.2                                             | 60.6                                              | 66.5                                              | 73.5                                             | <0.001  |
| Black (%)                               | 16.9                                             | 20.5                                              | 24.4                                              | 29.1                                             | <0.001  |
| SBP (mmHg)                              | 130 ± 19                                         | 130 ± 17                                          | 131 ± 18                                          | 131 ± 19                                         | 0.38    |
| Pulse pressure<br>(mm Hg)               | 62 ± 15                                          | 62 ± 14                                           | 64 ± 14                                           | 65 ± 16                                          | <0.001  |
| Heart rate<br>(beat/min)                | 64 ± 11                                          | 65 ± 11                                           | 66 ± 11                                           | 66 ± 11                                          | <0.001  |
| Hypertension (%)                        | 62.1                                             | 69.6                                              | 70.3                                              | 83.5                                             | <0.001  |
| Current smoking<br>(%)                  | 6.0                                              | 5.5                                               | 6.2                                               | 5.4                                              | 0.710   |
| Diabetes (%)                            | 25.3                                             | 23.8                                              | 29.3                                              | 39.0                                             | <0.001  |
| BMI (kg/m <sup>2</sup> )                | 27.5 ± 4.9                                       | 28.2 ± 5.4                                        | 28.3 ± 5.6                                        | 30.1 ± 6.3                                       | <0.001  |
| Triglycerides<br>(mg/dL)                | 102 (80,<br>139)                                 | 109 (84,<br>145)                                  | 114 (85, 148)                                     | 118 (92,<br>162)                                 | <0.001  |
| Total cholesterol<br>(mg/dL)            | 187.8 ± 39.7                                     | 187.5 ± 40.3                                      | 188.5 ± 41.9                                      | 182.6 ± 41.7                                     | 0.001   |
| HDL-C (mg/dL)                           | 53.8 ± 14.3                                      | 53.6 ± 14.0                                       | 54.4 ± 14.8                                       | 51.6 ± 12.8                                      | 0.007   |
| LDL-C (mg/dL)                           | 110.6 ± 32.5                                     | 109.5 ± 33.8                                      | 109.3 ± 34.5                                      | 103.9 ± 34.7                                     | <0.001  |
| eGFR<br>(mL/min/1.73m <sup>2</sup> )    | 77.8 ± 13.1                                      | 74.1 ± 14.4                                       | 70.5 ± 15.0                                       | 60.7 ± 18.3                                      | <0.001  |
| Chronic Kidney<br>Disease (eGFR<br><60) | 10.3                                             | 17.7                                              | 25.0                                              | 48.6                                             | <0.001  |

|                                  |                       |                       |                        |                        |        |
|----------------------------------|-----------------------|-----------------------|------------------------|------------------------|--------|
| mL/min/1.73m <sup>2</sup><br>(%) |                       |                       |                        |                        |        |
| NT-proBNP<br>(pg/mL)             | 98.5 (52.2,<br>178.6) | 97.4 (55.2,<br>194.8) | 121.0 (65.9,<br>225.5) | 163.5 (84.8,<br>316.6) | <0.001 |
| hs-TnT (ng/L)                    | 9 (6, 13)             | 9 (6,13)              | 10 (7, 14)             | 12 (8, 19)             | <0.001 |
| hs-TnI (ng/L)                    | 2.6 (1.9, 4.1)        | 2.8 (1.9, 4.3)        | 2.9 (2.0, 4.5)         | 3.7 (2.4, 6.2)         | <0.001 |
| hs-CRP (mg/L)                    | 1.61 (0.83,<br>3.41)  | 1.93 (0.91,<br>3.85)  | 2.03 (0.94,<br>4.22)   | 2.55 (1.24,<br>5.38)   | <0.001 |
| LVH (%)                          | 3.0                   | 4.5                   | 5.3                    | 6.4                    | <0.001 |

Data are presented as mean  $\pm$  SD, median (25<sup>th</sup>, 75<sup>th</sup> percentiles), or percentage. P-values for linear trend were calculated by using trend test across ordered groups. SBP, systolic blood pressure, BMI, body mass index; eGFR, estimated glomerular filtration rate; HDL-C, high-density lipoprotein cholesterol; hs-TnT, high-sensitivity troponin T; hs-TnI, high-sensitivity troponin I; hs-CRP, high-sensitivity C-reactive protein; LDL-C, low-density lipoprotein cholesterol; LVH, left ventricular hypertrophy (Cornell ECG criteria); NT-proBNP, N-terminal pro-B-type natriuretic peptide.

**Table S4. Cardiovascular outcomes by galectin-3 quartiles at ARIC visit 5 (group 2; N=4829).**

|                                    | Galectin-3 quartiles (ng/mL)           |                                         |                                         |                                        | P trend |
|------------------------------------|----------------------------------------|-----------------------------------------|-----------------------------------------|----------------------------------------|---------|
|                                    | 1 <sup>st</sup> Quartile<br>(4.2-13.9) | 2 <sup>nd</sup> Quartile<br>(14.0-16.7) | 3 <sup>rd</sup> Quartile<br>(16.8-20.1) | 4 <sup>th</sup> Quartile<br>(20.2-104) |         |
| <b>Incident total CHD</b>          |                                        |                                         |                                         |                                        |         |
| Incident rate                      | 5.5 (3.8-7.8)                          | 7.2 (5.3-9.9)                           | 6.4 (4.5-9.0)                           | 8.5 (6.3-11.5)                         | 0.10    |
| HR-model 1                         | <i>ref</i>                             | 1.46 (0.89-2.39)                        | 1.20 (0.70-2.03)                        | 1.59 (0.95-2.67)                       | 0.28    |
| HR-model 2                         | <i>ref</i>                             | 1.41 (0.86-2.33)                        | 1.13 (0.66-1.93)                        | 1.39 (0.80-2.41)                       | 0.49    |
| HR-model 3                         | <i>ref</i>                             | 1.38 (0.84-2.27)                        | 1.09 (0.64-1.86)                        | 1.19 (0.68-2.08)                       | 0.61    |
| <b>Incident ischemic stroke</b>    |                                        |                                         |                                         |                                        |         |
| Incident rate                      | 2.9 (1.78-4.7)                         | 4.8 (3.3-7.0)                           | 2.3 (1.3-4.1)                           | 6.9 (5.0-9.6)                          | 0.02    |
| HR-model 1                         | <i>ref</i>                             | 1.40 (0.74-2.64)                        | 0.63 (0.29-1.38)                        | 1.53 (0.81-2.92)                       | 0.07    |
| HR-model 2                         | <i>ref</i>                             | 1.40 (0.74-2.66)                        | 0.64 (0.29-1.40)                        | 1.55 (0.78-3.08)                       | 0.07    |
| HR-model 3                         | <i>ref</i>                             | 1.39 (0.73-2.63)                        | 0.61 (0.28-1.35)                        | 1.34 (0.67-2.69)                       | 0.11    |
| <b>Incident HF hospitalization</b> |                                        |                                         |                                         |                                        |         |
| Incident rate                      | 7.1 (5.2-9.7)                          | 10.4 (8.0-13.5)                         | 10.9 (8.4-14.1)                         | 23.1 (19.2-27.7)                       | <0.0001 |
| HR-model 1                         | <i>ref</i>                             | 1.37 (0.88-2.13)                        | 1.38 (0.89-2.14)                        | 2.31 (1.53-3.50)                       | 0.0002  |
| HR-model 2                         | <i>ref</i>                             | 1.32 (0.85-2.06)                        | 1.28 (0.82-2.01)                        | 1.96 (1.27-3.04)                       | 0.012   |
| HR-model 3                         | <i>ref</i>                             | 1.28 (0.82-2.00)                        | 1.15 (0.74-1.80)                        | 1.43 (0.91-2.23)                       | 0.41    |
| <b>Death</b>                       |                                        |                                         |                                         |                                        |         |
| Incident rate                      | 14.6 (11.7-18.1)                       | 17.2 (14.0-21.0)                        | 21.6 (17.9-25.9)                        | 33.1 (28.4-38.5)                       | <0.0001 |
| HR-model 1                         | <i>ref</i>                             | 1.12 (0.82-1.53)                        | 1.21 (0.89-1.65)                        | 1.79 (1.33-2.41)                       | 0.0002  |
| HR-model 2                         | <i>ref</i>                             | 1.09 (0.80-1.50)                        | 1.17 (0.85-1.59)                        | 1.62 (1.19-2.22)                       | 0.008   |
| HR-model 3                         | <i>ref</i>                             | 1.08 (0.79-1.49)                        | 1.08 (0.79-1.48)                        | 1.33 (0.97-1.84)                       | 0.29    |

Incidence rates are presented as rate/1,000 person years (95% confidence interval). Model data are presented as hazard ratio (95% confidence interval). For coronary heart disease (CHD), stroke, and death, model 1 was adjusted by age, sex, race, total cholesterol, HDL-C, SBP,

antihypertensive medication, current smoking, and diabetes status; for heart failure (HF), model 1 was the ARIC heart failure model and included age, sex, race, SBP, antihypertensive medication, current smoking, diabetes status, BMI, and heart rate. Model 2 was model 1 plus eGFR. Model 3 was model 2 plus log NT-proBNP and log hs-TnT.



**Table S5. Baseline characteristics at visit 4 across absolute change in galectin-3 levels from visit 4 to visit 5 (group 3; N=4981).**

| Risk factors                            | $\Delta$ Galectin-3 quartiles (ng/mL)                 |                                                  |                                                    |                                                     | P trend |
|-----------------------------------------|-------------------------------------------------------|--------------------------------------------------|----------------------------------------------------|-----------------------------------------------------|---------|
|                                         | 1 <sup>st</sup> quartile<br>(-32.4 to 1.1,<br>n=1262) | 2 <sup>nd</sup> quartile<br>(1.2-3.0,<br>n=1273) | 3 <sup>rd</sup> quartile<br>(3.001–5.4,<br>n=1208) | 4 <sup>th</sup> quartile<br>(5.401-69.5,<br>n=1238) |         |
| Age (year)                              | 60.0±4.9                                              | 60.5±4.9                                         | 61.3±5.1                                           | 62.1±5.4                                            | <0.001  |
| Female (%)                              | 66.2                                                  | 57.9                                             | 56.4                                               | 58.0                                                | <0.001  |
| Black (%)                               | 17.7                                                  | 17.4                                             | 23.3                                               | 24.6                                                | <0.001  |
| SBP (mmHg)                              | 120 ± 16                                              | 122 ± 17                                         | 126 ± 17                                           | 130 ± 18                                            | <0.001  |
| Pulse pressure<br>(mm Hg)               | 50 ± 13                                               | 51 ± 13                                          | 53 ± 13                                            | 58 ± 16                                             | <0.001  |
| Heart rate<br>(beat/min)                | 65 ± 9                                                | 65 ± 9                                           | 65 ± 9                                             | 66 ± 9                                              | 0.052   |
| Hypertension (%)                        | 29.8                                                  | 30.3                                             | 40.3                                               | 53.7                                                | <0.001  |
| Current smoking<br>(%)                  | 9.3                                                   | 10.7                                             | 12.2                                               | 11.8                                                | 0.02    |
| Diabetes (%)                            | 5.2                                                   | 6.3                                              | 12.0                                               | 19.4                                                | <0.001  |
| BMI (kg/m <sup>2</sup> )                | 27.9 ± 5.1                                            | 27.9± 5.0                                        | 28.4 ± 5.0                                         | 29.7 ± 5.6                                          | <0.001  |
| Triglycerides<br>(mg/dL)                | 119 (86, 166)                                         | 115 (84, 160)                                    | 120 (87, 168)                                      | 123 (91, 174)                                       | 0.007   |
| Total cholesterol<br>(mg/dL)            | 203.5 ± 35.7                                          | 200.7 ± 34.9                                     | 201.3±34.9                                         | 202.1±36.6                                          | 0.36    |
| HDL-C (mg/dL)                           | 52.9±16.4                                             | 52.3±17.2                                        | 51.0±16.0                                          | 49.8±16.1                                           | <0.001  |
| LDL-C (mg/dL)                           | 123.4 ± 32.0                                          | 122.0 ± 32.1                                     | 122.8 ± 31.8                                       | 123.5 ± 33.7                                        | 0.93    |
| eGFR<br>(mL/min/1.73m <sup>2</sup> )    | 88.5 ± 14.5                                           | 89.0 ± 13.4                                      | 88.9 ± 13.8                                        | 87.1 ± 15.6                                         | 0.006   |
| Chronic Kidney<br>Disease (eGFR<br><60) | 3.0                                                   | 2.5                                              | 2.2                                                | 4.8                                                 | 0.02    |

|                                  |                      |                      |                       |                       |        |
|----------------------------------|----------------------|----------------------|-----------------------|-----------------------|--------|
| mL/min/1.73m <sup>2</sup><br>(%) |                      |                      |                       |                       |        |
| NT-proBNP<br>(pg/mL)             | 52.1 (27.2,<br>97.3) | 50.7 (25.5,<br>97.9) | 53.5 (25.8,<br>100.8) | 64.9 (33.2,<br>121.7) | <0.001 |
| hs-TnT (ng/L)                    | 3 (1.5, 6)           | 4 (1.5, 6)           | 4 (1.5, 7)            | 5 (1.5, 8)            | <0.001 |
| hs-TnI (ng/L)                    | 1.7 (1.2, 2.5)       | 1.9 (1.3, 2.6)       | 2.0 (1.3, 2.8)        | 2.1 (1.5, 3.1)        | <0.001 |
| hs-CRP                           | 2.2 (1.0, 4.8)       | 1.8 (0.9, 4.3)       | 2.1 (1.0, 4.8)        | 2.6 (1.2, 5.1)        | <0.001 |
| LVH (%)                          | 1.86                 | 1.54                 | 2.43                  | 3.11                  | 0.060  |

Data are presented as mean  $\pm$  SD, median (25<sup>th</sup> percentile, 75<sup>th</sup> percentile), or percentage. P-values for linear trend were calculated by using trend test across ordered groups. SBP, systolic blood pressure, BMI, body mass index; eGFR, estimated glomerular filtration rate; HDL-C, high-density lipoprotein cholesterol; hs-TnT, high-sensitivity troponin T; hs-TnI, high-sensitivity troponin I; hs-CRP, high-sensitivity C-reactive protein; LDL-C, low-density lipoprotein cholesterol; LVH, left ventricular hypertrophy (Cornell ECG criteria); NT-proBNP, N-terminal pro-B-type natriuretic peptide.

**Figure S1. Age-, race-, and sex-adjusted survival curves assessing the time to incident coronary heart disease (CHD), ischemic stroke, heart failure hospitalization (HF), and total mortality across galectin-3 quartiles at visit 4.**

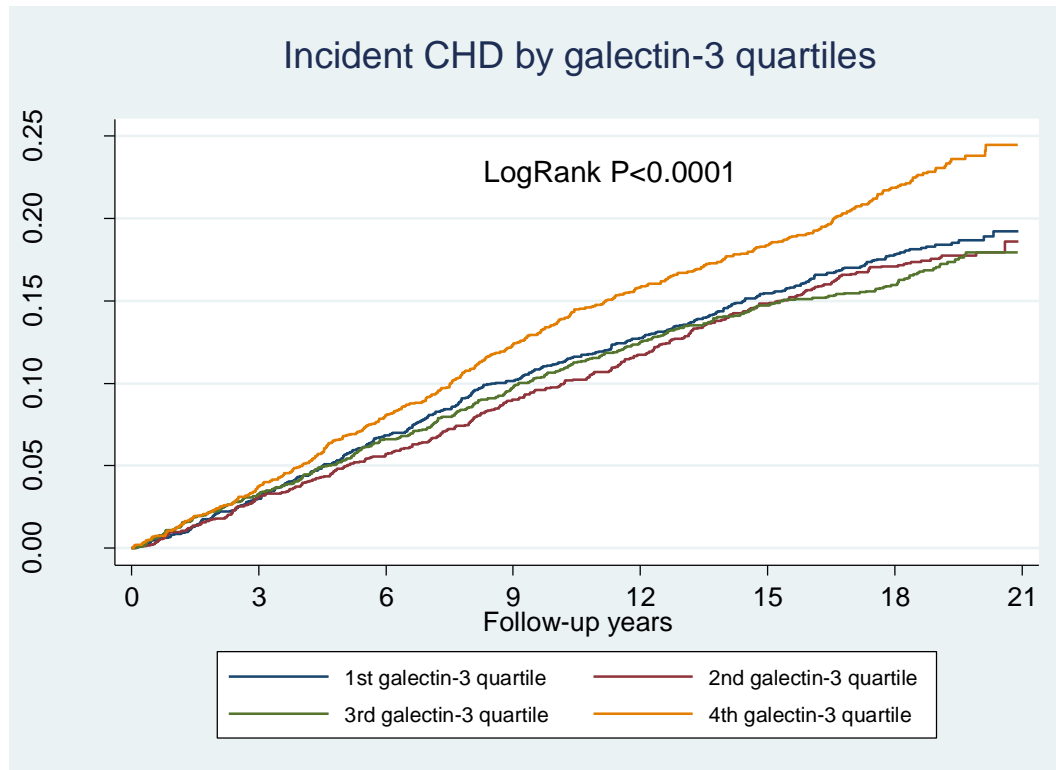

### Incident stroke by galectin-3 quartiles

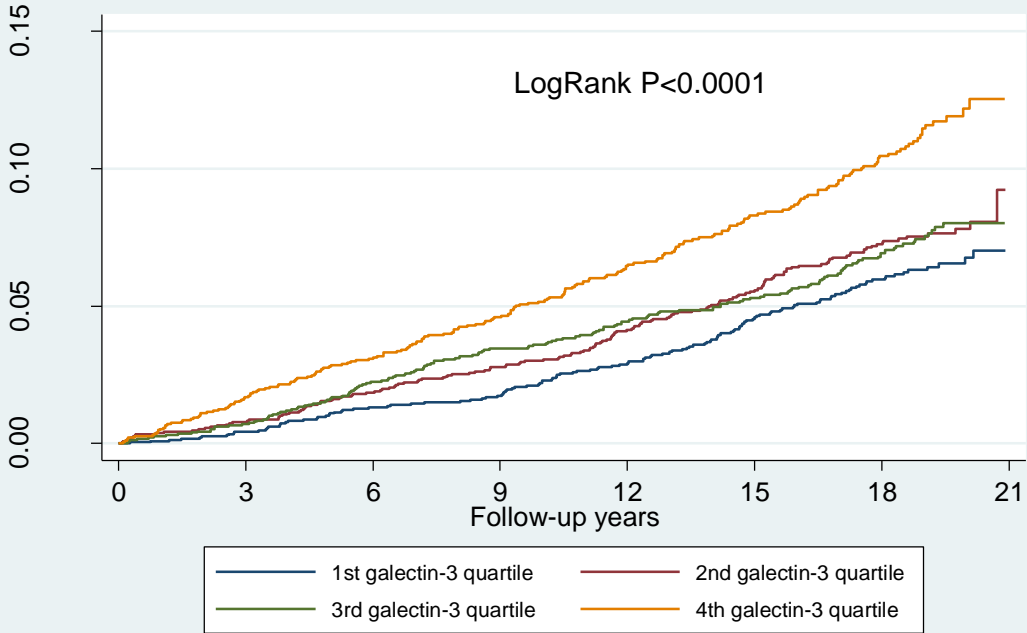

### Incident HF by galectin-3 quartiles

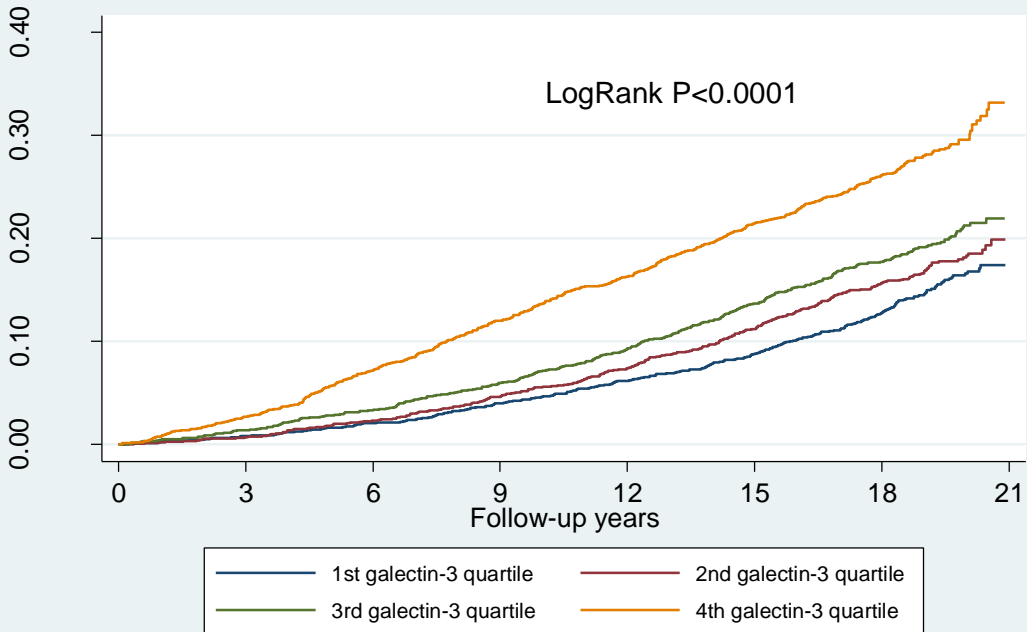

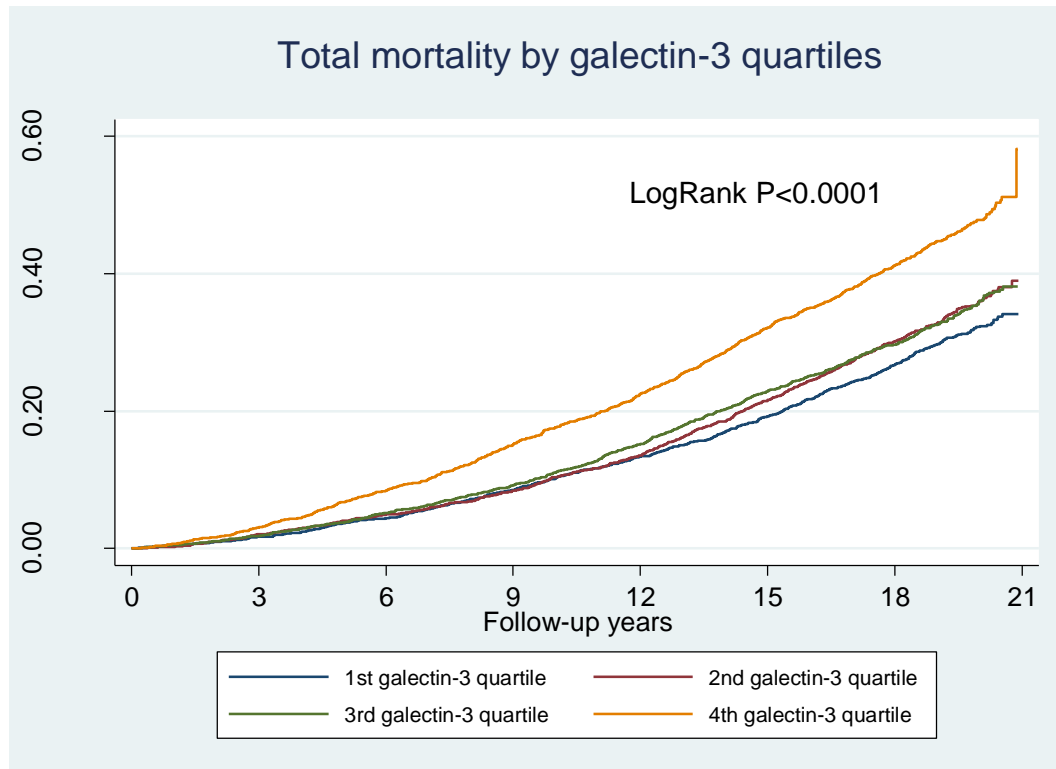

P-values were calculated by log-rank test for equality of survival function. Crude incidence rates were calculated as number of events per 1000 person-years.
